# Supplementary material for: Assessing Movement Quality in Youth Footballers: The Relationship between Hip and Lower Limb Movement Screen and Functional Movement Screen
Source: MDPI journal article supplement (doi:10.3390/app11199298), 2021-10-07

**Figure S2: Symmetrical tasks of the Hip and Lower Limb Movement Score in relation to symmetrical tasks of the Functional Movement Screen (data on 41 footballers – some participants obtained the same pair of HLLMS and FMS scores and therefore their points are superimposed).**

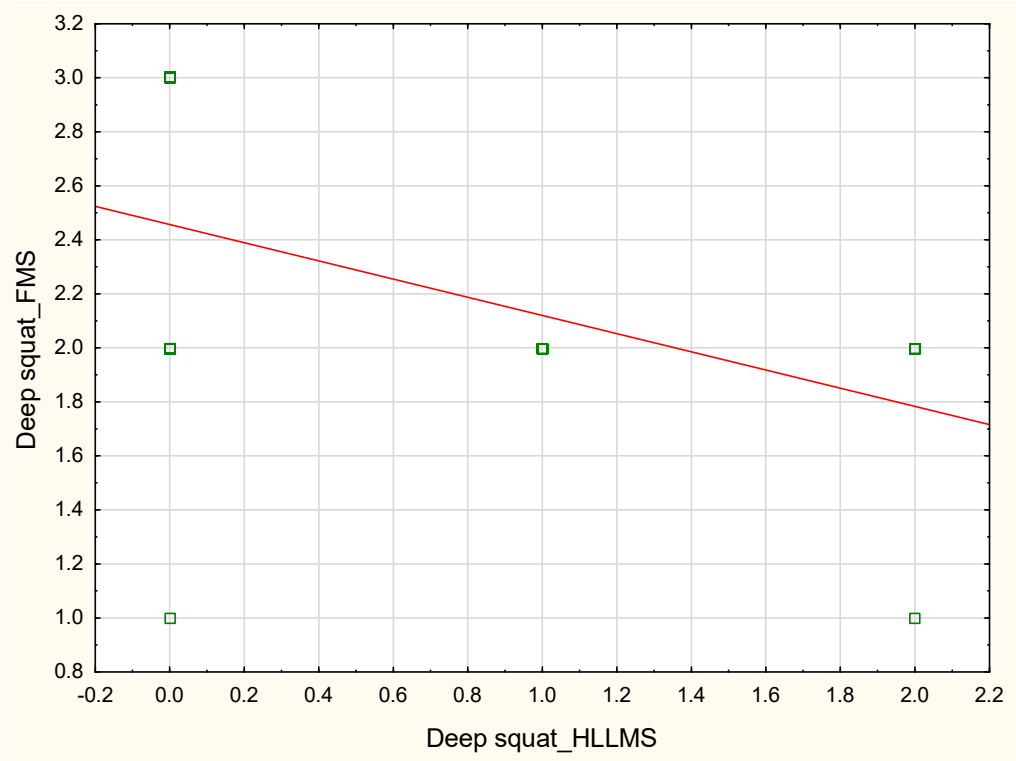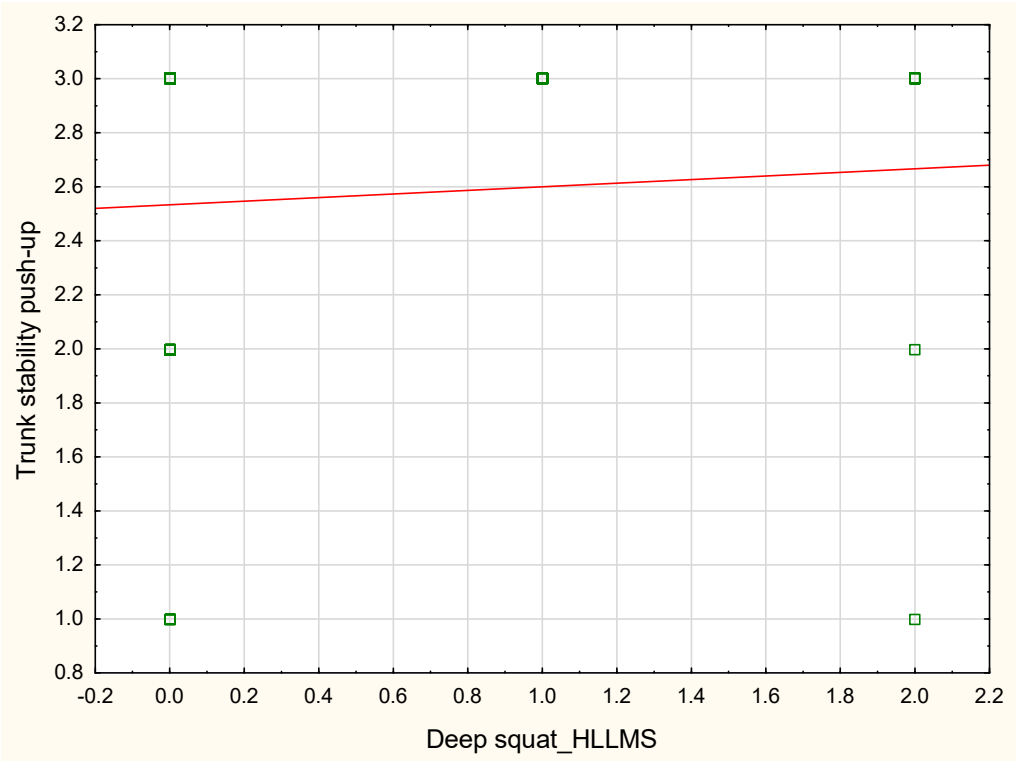

Supplement: s1 [file s1]
